# Supplementary material for: Characterization of natural variation in North American Atlantic Salmon populations (Salmonidae: Salmo salar) at a locus with a major effect on sea age
Source: PubMed Central journal article supplement (PMC5550958; doi:10.1002/ece3.3132), 2017-06-17

**Supplementary Material:** “Characterization of natural variation in North American Atlantic Salmon populations (Salmonidae: *Salmo salar*) at a locus with a major effect on sea age”

**Supplementary Table 1.** Sample sizes for resequencing assay.

| <b>river</b> | <b>year</b> | <b><i>n</i> 1SW</b> | <b><i>n</i> MSW</b> |
|--------------|-------------|---------------------|---------------------|
| Malbaie      | 2003        | 50                  | 77                  |
| Malbaie      | 2004        | 50                  | 100                 |
| Malbaie      | 2005        | 50                  | 68                  |
|              |             | <b>Σ 150</b>        | <b>Σ 245</b>        |
| Escoumins    | 2009        | 50                  | 100                 |
| Escoumins    | 2010        | 0                   | 96                  |
| Escoumins    | 2011        | 30                  | 100                 |
|              |             | <b>Σ 80</b>         | <b>Σ 296</b>        |
| Trinité      | 2010        | 50                  | 30                  |
| Trinité      | 2011        | 50                  | 42                  |
| Trinité      | 2012        | 50                  | 61                  |
| Trinité      | 2013        | 32                  | 36                  |
| Trinité      | 2014        | 29                  | 16                  |
| Trinité      | 2015        | 50                  | 43                  |
|              |             | <b>Σ 261</b>        | <b>Σ 228</b>        |
| Vieux-Fort   | 2011        | 43                  | 16                  |
| Vieux-Fort   | 2012        | 35                  | 3                   |
| Vieux-Fort   | 2013        | 23                  | 11                  |
| Vieux-Fort   | 2014        | 40                  | 10                  |
| Vieux-Fort   | 2015        | 21                  | 43                  |
|              |             | <b>Σ 162</b>        | <b>Σ 83</b>         |

$$\Sigma_{1SW} = 653 \quad \Sigma_{MSW} = 852$$

$$\Sigma_{Total} = 1505$$

**Supplementary Table 2.** PCR primer sequences to target the non-synonymous SNPs in *vgll3* and *akap11*, as well as for SNPs *SIX6*<sub>TOP</sub> (Barson et al. 2015) and *SIX6*<sub>EXT</sub>.

| <b>name</b> | <b>target</b>                                           | <b>product size</b> | <b>forward primer</b> | <b>reverse primer</b> |
|-------------|---------------------------------------------------------|---------------------|-----------------------|-----------------------|
| VGLL3_323   | Asn323Lys <sub>vgll3</sub>                              | 406 bp              | CTCCAACCTCTCTCCCTGAC  | CTCCAGGTCAGAGGCTTACC  |
| VGLL3_54    | Met54Thr <sub>vgll3</sub>                               | 444 bp              | TGGCTGAATCTGTGGCATAAC | GTGTGCTCCTACCTTTCCAC  |
| AKAP11      | Val214Met <sub>akap11</sub>                             | 433 bp              | AGTCTCGGTTACCACTGCTC  | CAGAGTCAGAGTCCTCCACC  |
| SIX6        | <i>SIX6</i> <sub>TOP</sub> , <i>SIX6</i> <sub>EXT</sub> | 433 bp              | ATATCAAAGGGAACGAACGGT | ACGGGGTAAGTAATCGCTGT  |

**Supplementary Table 3.** Model selection based on AIC comparisons. Model 1 with the three-way interaction of SNP genotypes, sex and river was identified as the best model for all four candidate SNPs. For all four SNP candidates, the model 1 fitted the data better than the null model (sea age ~ sex:river-1 + (1|year); df = 9, AIC = 1130.218).

| model    | model description                                      | Asn323Lys <sub>vgll3</sub> |               |            | Met54Thr <sub>vgll3</sub> |               |            | SIX6 <sub>TOP</sub> |               |            | SIX6 <sub>EXT</sub> |               |            |
|----------|--------------------------------------------------------|----------------------------|---------------|------------|---------------------------|---------------|------------|---------------------|---------------|------------|---------------------|---------------|------------|
|          |                                                        | df                         | AIC           | ΔAIC       | df                        | AIC           | ΔAIC       | df                  | AIC           | ΔAIC       | df                  | AIC           | ΔAIC       |
| <b>1</b> | <b>sea age ~ SNP:sex:river-1 + (1 year)</b>            | <b>23</b>                  | <b>1111.2</b> | <b>0.0</b> | <b>23</b>                 | <b>1111.5</b> | <b>0.0</b> | <b>23</b>           | <b>1029.4</b> | <b>0.0</b> | <b>25</b>           | <b>1030.4</b> | <b>0.0</b> |
| 2        | sea age ~ SNP-1 + sex + SNP:sex + (1 river) + (1 year) | 8                          | 1156.1        | 44.9       | 8                         | 1154.9        | 43.3       | 8                   | 1057.8        | 28.4       | 8                   | 1049.1        | 18.7       |
| 3        | sea age ~ SNP:sex-1 + (1 river) + (1 year)             | 8                          | 1156.1        | 44.9       | 8                         | 1154.9        | 43.3       | 8                   | 1057.8        | 28.4       | 8                   | 1049.1        | 18.7       |
| 4        | sea age ~ SNP-1 + (sex) + (1 river) + (1 year)         | 6                          | 1154.7        | 43.5       | 6                         | 1153.6        | 42.1       | 6                   | 1054.2        | 24.8       | 6                   | 1049.0        | 18.6       |
| 5        | sea age ~ SNP-1 + (1 sex) + (1 river) + (1 year)       | 6                          | 1163.2        | 52.0       | 6                         | 1162.1        | 50.6       | 6                   | 1062.6        | 33.2       | 6                   | 1057.3        | 27.0       |
| 6        | sea age ~ SNP-1 + (1 sex) + (1 river)                  | 5                          | 1175.2        | 64.0       | 5                         | 1172.6        | 61.0       | 5                   | 1072.9        | 43.5       | 5                   | 1067.6        | 37.2       |
| 7        | sea age ~ SNP-1 + (1 sex)                              | 4                          | 1470.6        | 359.5      | 4                         | 1462.7        | 351.2      | 4                   | 1279.6        | 250.2      | 4                   | 1338.2        | 307.8      |

**Supplementary Table 4.** Percentage probability of being MSW and not 1SW for candidate SNP genotypes across sexes and populations (mean and 95 % Bayesian credible interval in parentheses, null hypothesis = 50 %). Results refer to the best model investigating the three-way interaction of SNP genotypes, sex and river (model 1 in Supplementary Table 3). Non-significant comparisons are marked “ns” and “NA” indicates lacking data.

|            |   | <b>Asn323Lys<sub>vgl3</sub></b> |            |             | <b>Met54Thr<sub>vgl3</sub></b> |            |             | <b>SIX6<sub>TOP</sub></b> |            |            | <b>SIX6<sub>EXT</sub></b> |            |             |
|------------|---|---------------------------------|------------|-------------|--------------------------------|------------|-------------|---------------------------|------------|------------|---------------------------|------------|-------------|
|            |   | <b>EE</b>                       | <b>EL</b>  | <b>LL</b>   | <b>EE</b>                      | <b>EL</b>  | <b>LL</b>   | <b>AA</b>                 | <b>AG</b>  | <b>GG</b>  | <b>CC</b>                 | <b>TC</b>  | <b>TT</b>   |
| Escoumins  | ♀ | ns                              | 95 (87-98) | 99 (96-100) | ns                             | 95 (87-98) | 99 (95-100) | ns                        | 98 (93-99) | 97 (89-99) | 97 (89-99)                | 98 (93-99) | ns          |
|            | ♂ | ns                              | ns         | 64 (50-76)  | ns                             | ns         | ns          | 70 (52-84)                | ns         | ns         | ns                        | ns         | 72 (53-86)  |
| Malbaie    | ♀ | ns                              | 95 (85-98) | 98 (93-100) | ns                             | 95 (85-98) | 98 (93-100) | 98 (85-100)               | 97 (89-99) | ns         | ns                        | 97 (89-99) | 98 (84-100) |
|            | ♂ | ns                              | 21 (10-39) | 29 (18-43)  | ns                             | 22 (11-39) | 29 (18-42)  | ns                        | 23 (13-37) | 21 (10-38) | 22 (11-40)                | 23 (13-38) | ns          |
| Trinité    | ♀ | ns                              | ns         | 91 (85-95)  | ns                             | 31 (18-50) | 90 (84-95)  | 82 (56-95)                | 88 (77-94) | 86 (75-92) | 86 (74-92)                | 88 (78-94) | 82 (55-94)  |
|            | ♂ | ns                              | ns         | 6 (3-10)    | ns                             | ns         | 6 (3-11)    | 8 (2-28)                  | 6 (2-13)   | 5 (2-11)   | 5 (2-11)                  | 5 (2-11)   | 7 (2-25)    |
| Vieux-Fort | ♀ | NA                              | ns         | ns          | NA                             | ns         | ns          | NA                        | ns         | ns         | ns                        | ns         | ns          |
|            | ♂ | NA                              | ns         | 11 (5-23)   | NA                             | ns         | 11 (6-23)   | NA                        | ns         | 11 (5-22)  | 5 (1-29)                  | 11 (4-27)  | 14 (3-45)   |

**Supplementary Figure 1.** Definition of sea age categories based on fork length. Specimen illustration by Knepp, Timothy - U.S. Fish & Wildlife Service. Licensed under public domain via Wikimedia Commons – <http://commons.wikimedia.org>.

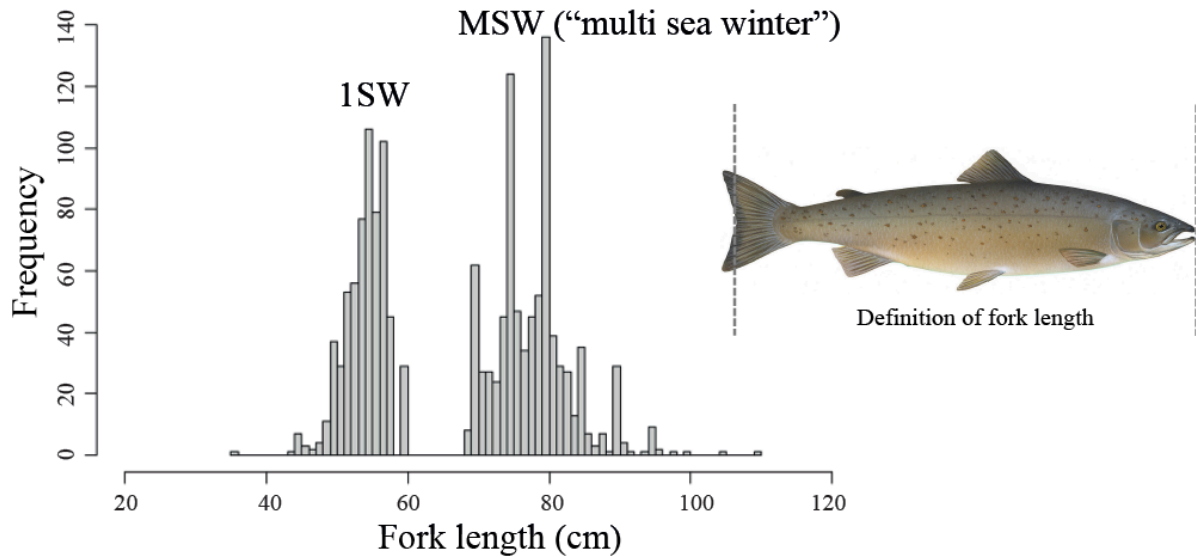

**Supplementary Figure 2A-D.** Genotype distributions of candidate SNPs for sea age in four salmon rivers from Québec, Canada. Data are displayed in two ways, the observed data (Table 1) and adjusted for unequal sample sizes of 1SW and MSW fish to anticipate a distribution what the genotype distribution could be if equal amounts of 1SW and MSW fish were sampled within each sex. Specimen illustrations by Knepp, Timothy - U.S. Fish & Wildlife Service. Licensed under public domain via Wikimedia Commons – <http://commons.wikimedia.org>.

A)

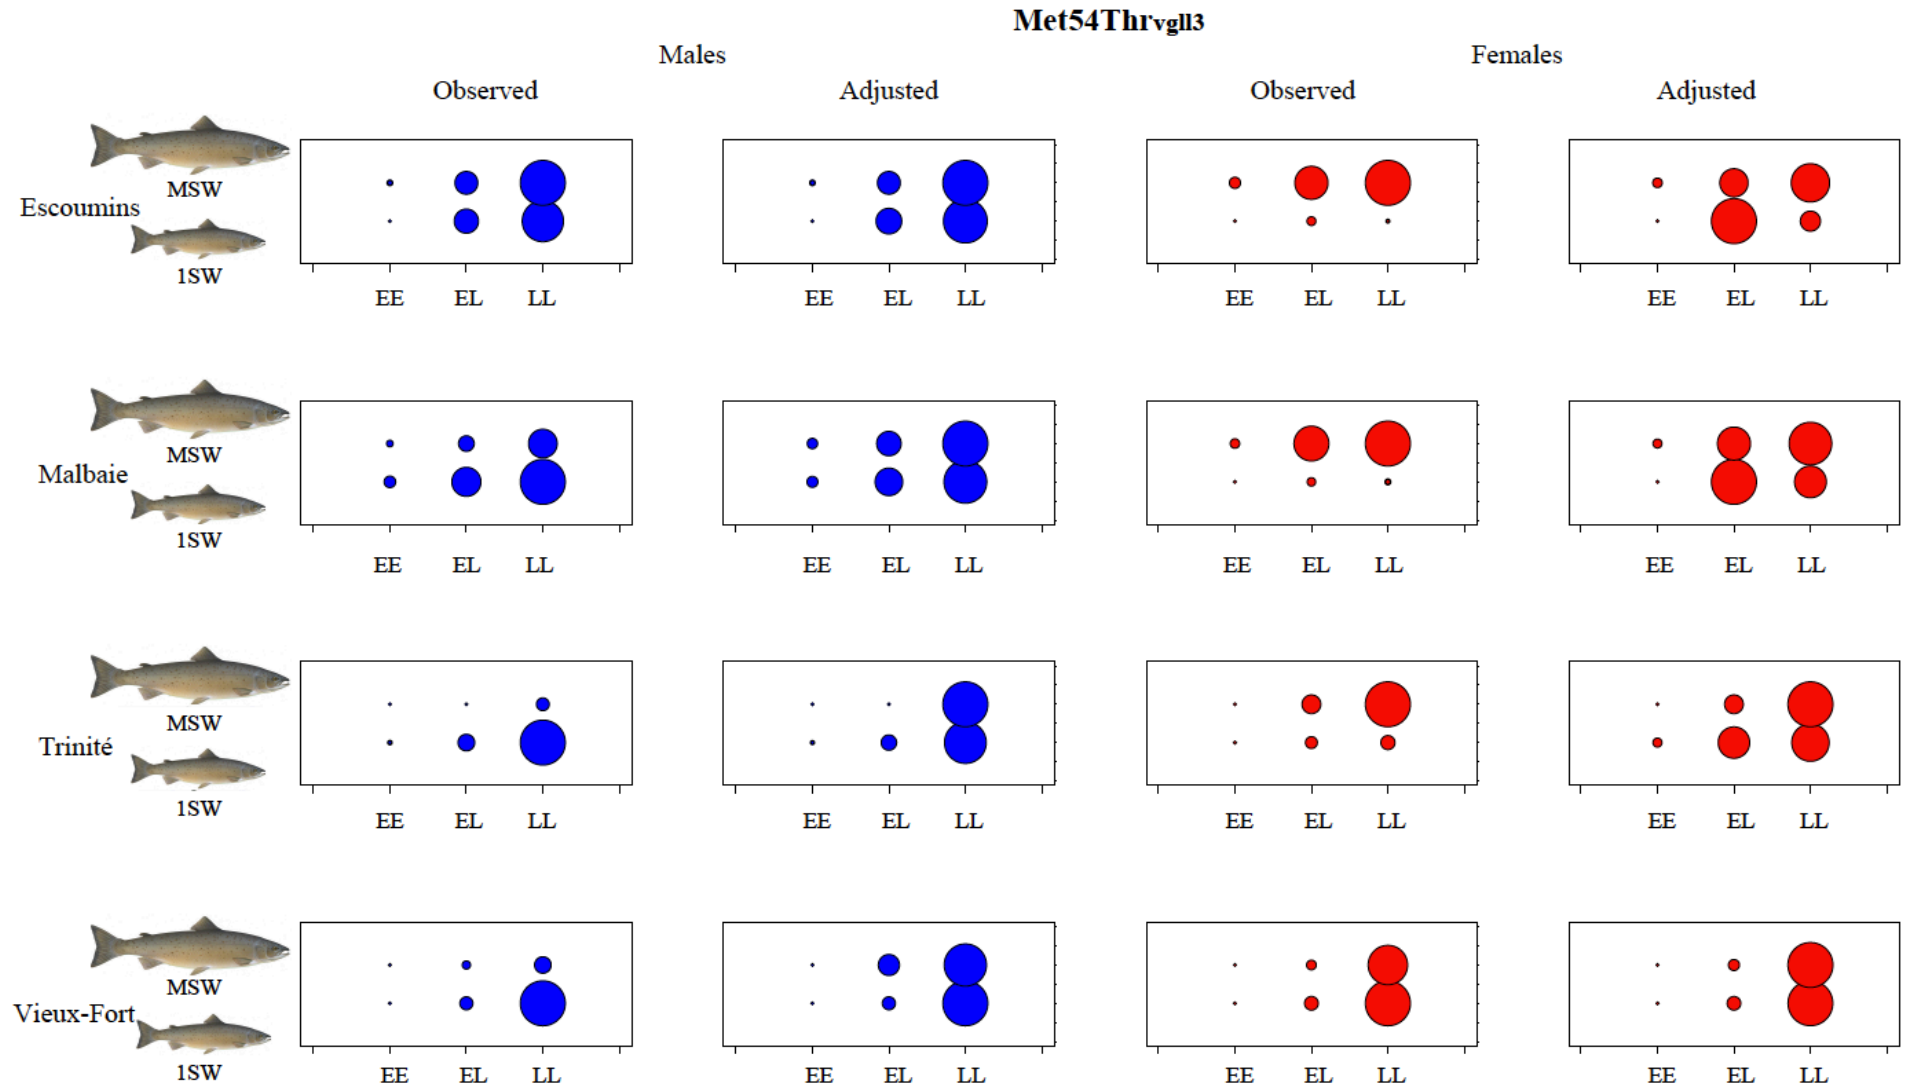

B)

*Asn323Lysvgl3*

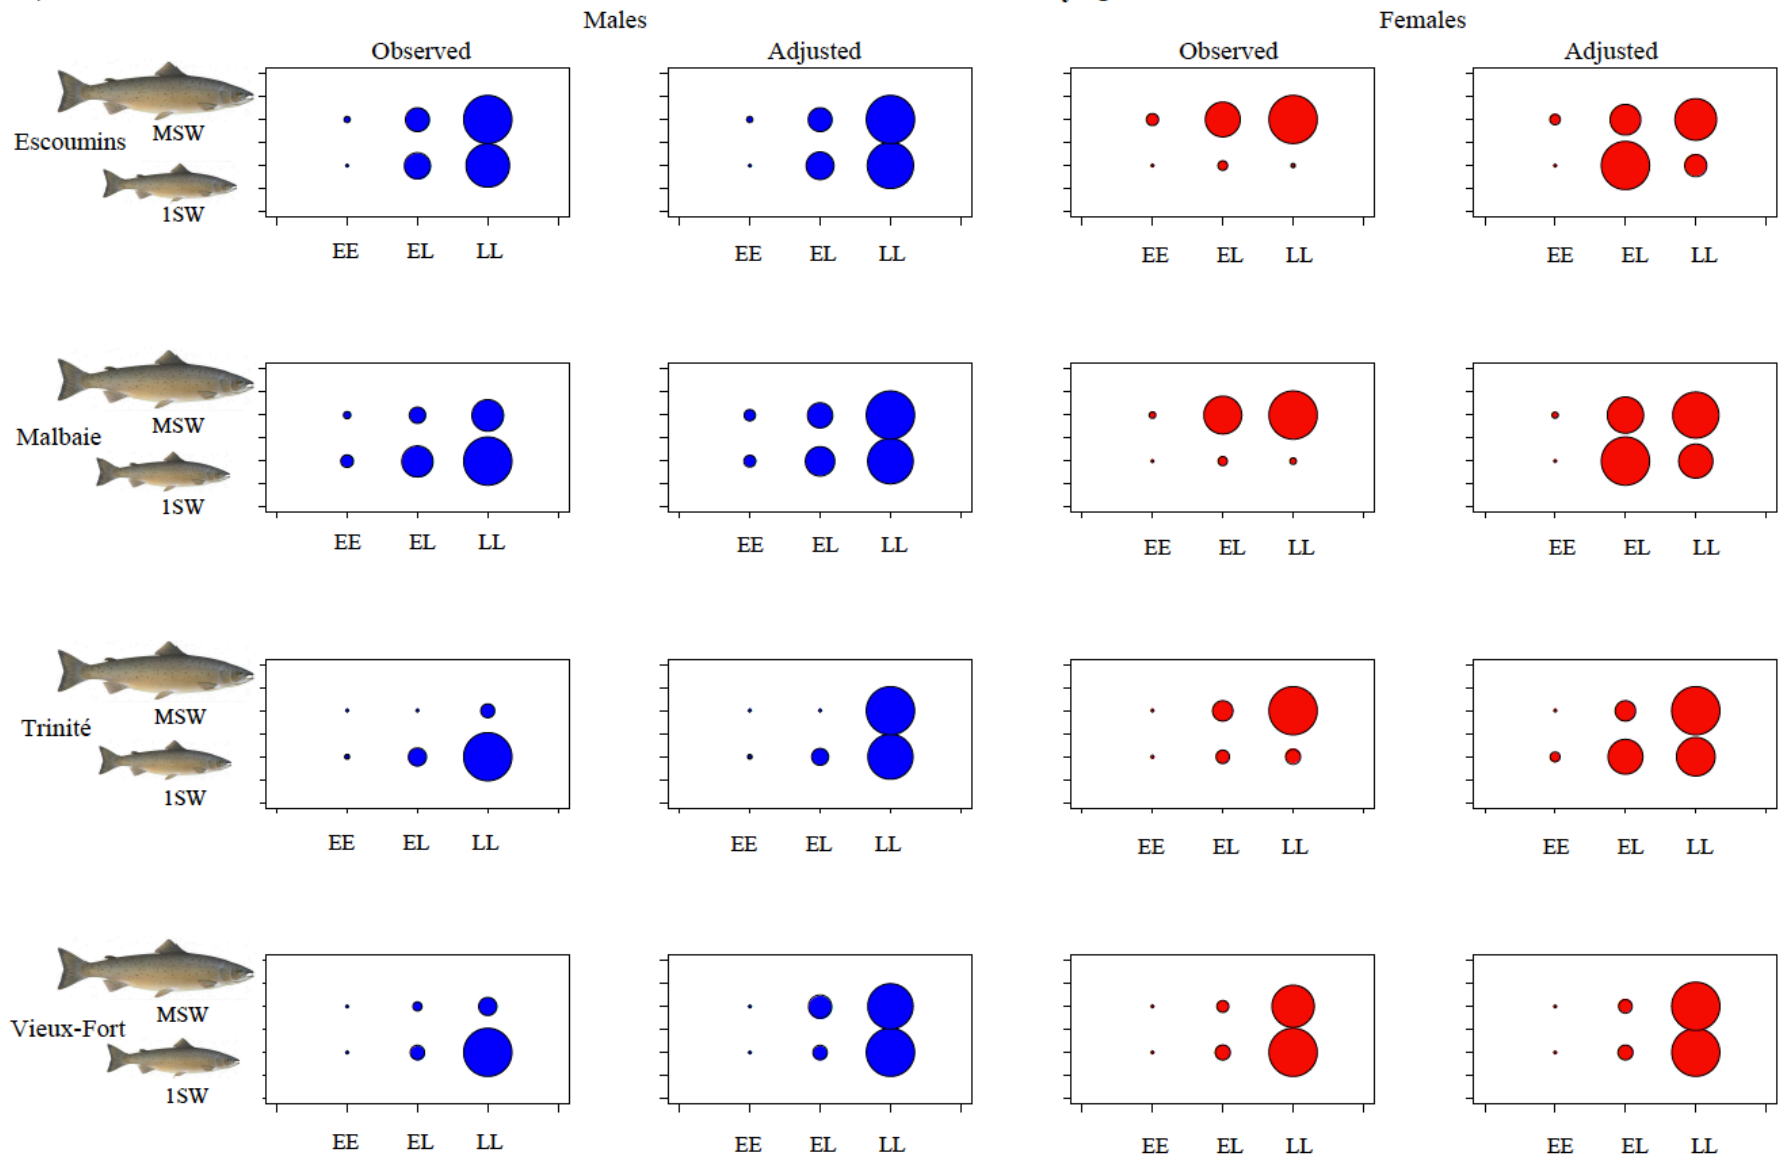

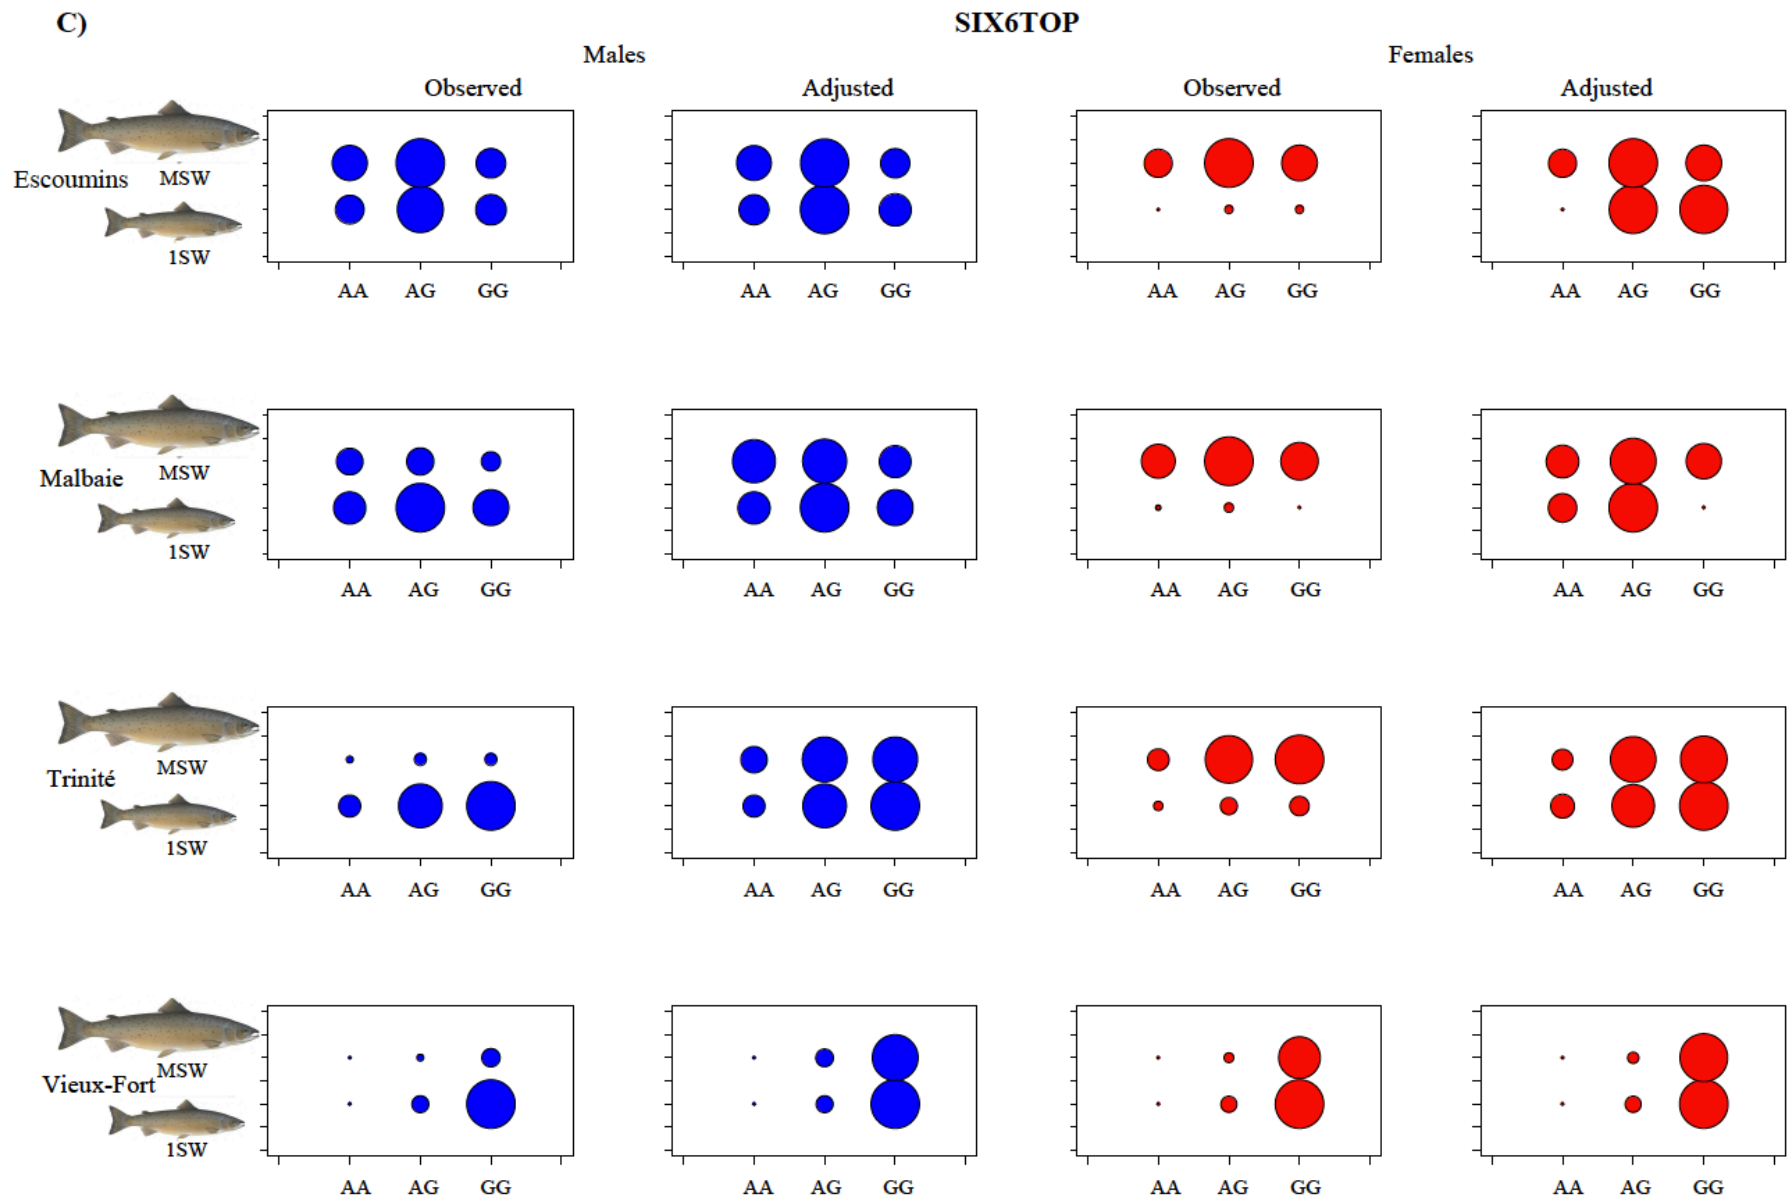



D)

SIX6EXT

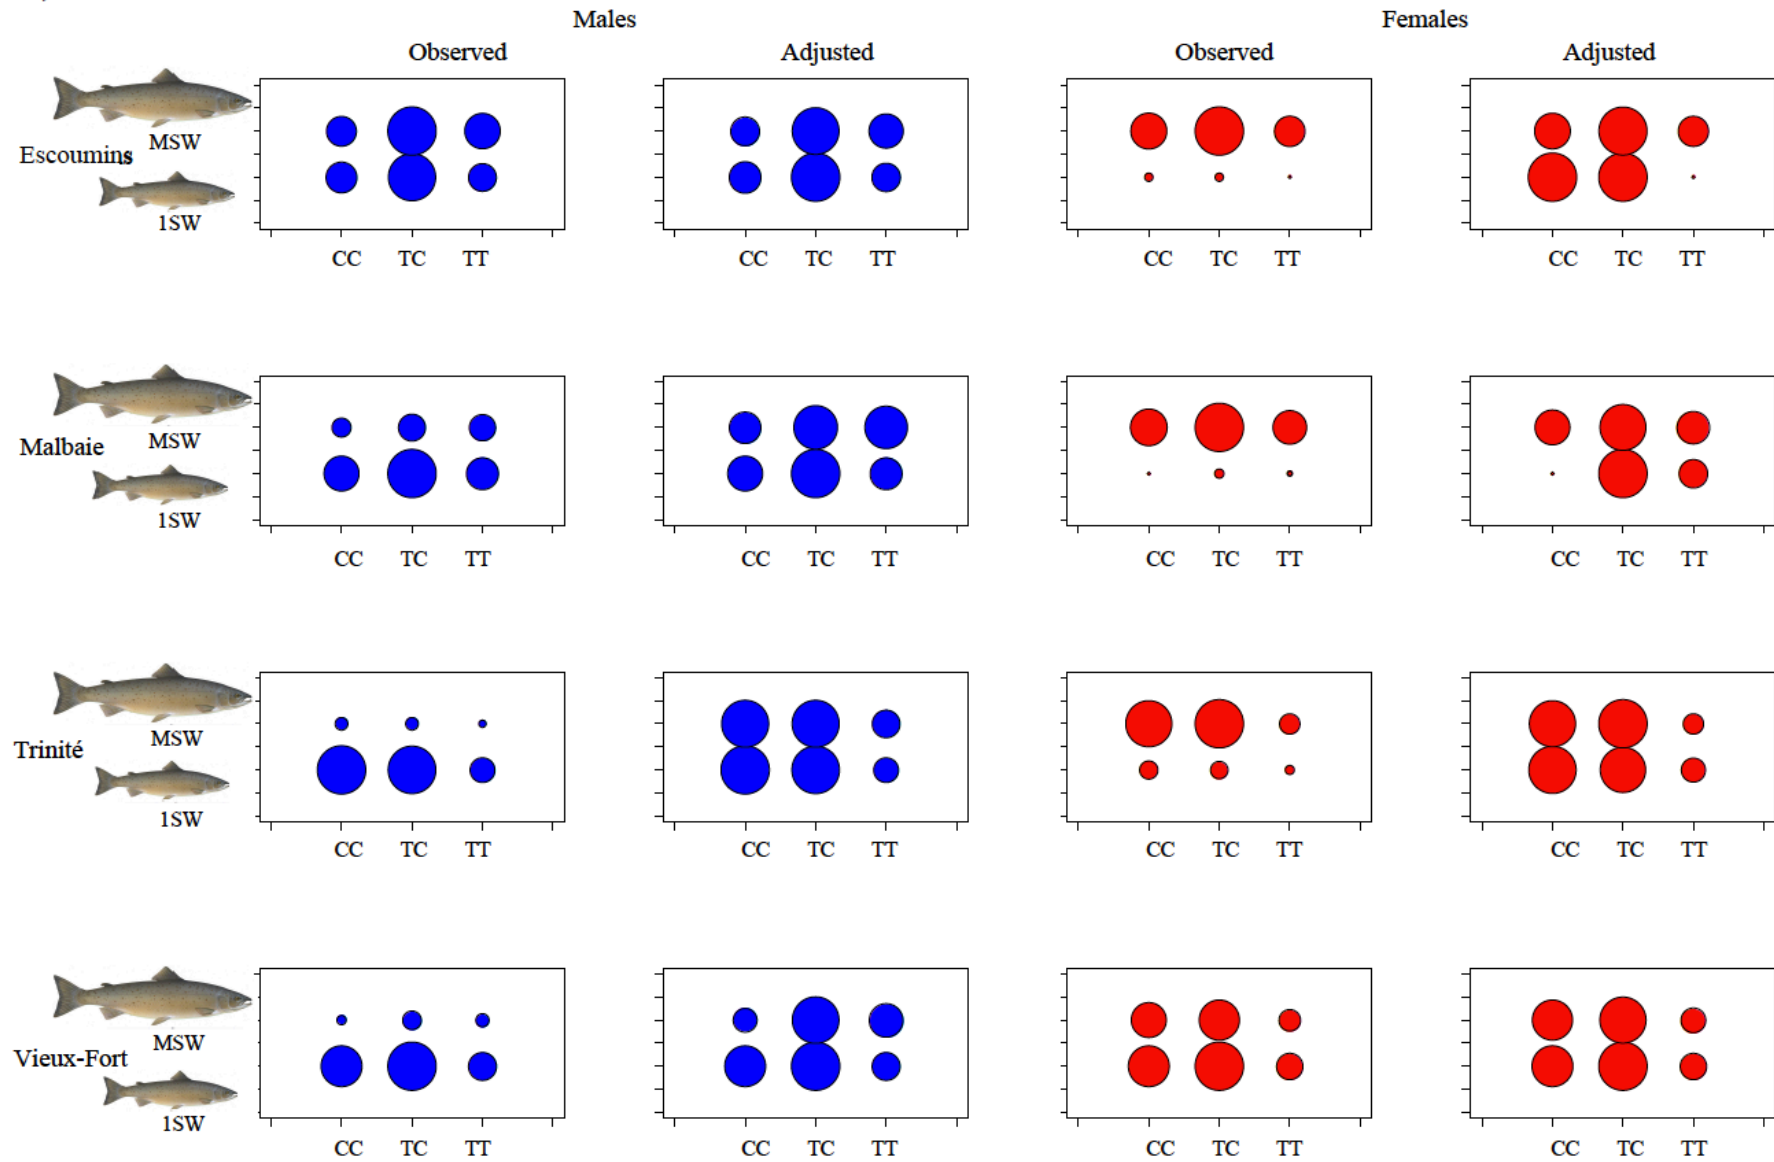

Supplement: ECE3-7-5797-s001.pdf [file ECE3-7-5797-s001.pdf]
